# Supplementary material for: The Mediterranean Diet is Associated with an Improved Quality of Life in Adults with Type 1 Diabetes
Source: PubMed Central journal article supplement (PMC7020074; doi:10.3390/nu12010131), 2020-01-02
Supplement: nutrients-12-00131-s001.pdf [file nutrients-12-00131-s001.pdf]

## Supplementary Materials

**Table S1.** Daily food intake of the study group.

| Daily food intake (g/day) <sup>a</sup> | T1D (n = 258)           |
|----------------------------------------|-------------------------|
| Dairy products                         | 368.0 [226.0; 548.0]    |
| Eggs                                   | 20.8 [17.5; 23.7]       |
| White meat                             | 34.8 [18.2; 48.7]       |
| Red meat                               | 43.4 [24.9; 67.8]       |
| Processed meat                         | 37.3 [24.4; 56.3]       |
| Meat                                   | 124.0 [93.4; 157.0]     |
| Lean fish                              | 21.2 [14.0; 43.6]       |
| Fatty fish                             | 29.5 [15.9; 48.7]       |
| Seafood                                | 7.5 [4.5; 12.7]         |
| Fish                                   | 68.1 [45.6; 100.0]      |
| Fruits                                 | 209.0 [136.0; 308.0]    |
| Vegetables                             | 228.0 [162.0; 305.0]    |
| Nuts                                   | 5.0 [0.9; 13.4]         |
| Legumes                                | 23.2 [15.6; 53.2]       |
| Cereals and pasta                      | 75.9 [48.4; 111.0]      |
| Potatoes                               | 50.6 [28.4; 70.8]       |
| Bread                                  | 99.1 [62.7; 135.0]      |
| Sweets                                 | 9.8 [2.6; 24.2]         |
| Vegetable fats                         | 39.1 [27.9; 51.4]       |
| Animal fats                            | 0.0 [0.0; 0.0]          |
| Alcohol drinks                         | 26.8 [0.0; 102.0]       |
| Non-alcoholic beverages                | 1468.0 [1168.0; 1848.0] |
| Coffee and tea                         | 461.0 [200.0; 540.0]    |
| Prepared meals                         | 44.3 [19.0; 96.5]       |
| Salt                                   | 0.2 [0.0; 1.6]          |

<sup>a</sup> Adjusted by energy intake. Data are shown as median [interquartile].

**Table S2.** Daily nutritional intake of the study group.

| Daily nutrient intake (unit/day) <sup>a</sup> | T1D (n = 258)        |
|-----------------------------------------------|----------------------|
| Energy intake (Kcal)                          | 2075.1 ± 514.1       |
| Carbohydrate (g)                              | 191.0 [175.0; 210.0] |
| Complex carbohydrate (g)                      | 87.9 [76.7; 100.0]   |
| Sugar (g)                                     | 78.6 [64.8; 95.4]    |
| Fiber (g)                                     | 22.2 [18.8; 26.2]    |
| Soluble fiber (g)                             | 3.4 [2.7; 4.3]       |
| Insoluble fiber (g)                           | 12.9 [10.4; 15.8]    |
| Glycemic index (%)                            | 82.5 [73.9; 93.1]    |
| Protein (g)                                   | 97.6 ± 14.8          |
| Total fat (g)                                 | 103.0 ± 15.3         |
| Saturated fatty acids (g)                     | 26.1 [23.2; 29.1]    |
| Mono-unsaturated fatty acids (g)              | 52.2 ± 10.6          |
| Poly-unsaturated fatty acids (g)              | 16.2 [14.6; 18.4]    |
| Omega 3 (g)                                   | 1.6 [1.4; 1.8]       |
| Omega 6 (g)                                   | 14.4 [12.7; 16.6]    |
| Trans fat (g)                                 | 1.0 [0.7; 1.2]       |
| Cholesterol (mg)                              | 286.0 [250.0; 321.0] |
| Palmitic acid (g)                             | 16.2 [14.5; 17.7]    |
| Stearic acid (g)                              | 6.0 ± 1.1            |
| Oleic acid (g)                                | 49.6 ± 10.4          |
| Linoleic acid (g)                             | 14.4 [12.6; 16.5]    |

|                              |                         |
|------------------------------|-------------------------|
| Linolenic acid (g)           | 1.2 [1.0; 1.2]          |
| Arachidonic acid (g)         | 0.2 [0.1; 0.2]          |
| Eicosapentaenoic acid (g)    | 0.1 [0.1; 0.2]          |
| Docosahexaenoic acid (g)     | 0.3 [0.2; 0.4]          |
| Alcohol (g)                  | 2.3 [0.0; 6.9]          |
| Caffeine (g)                 | 188.0 [62.3; 420.0]     |
| Water (g)                    | 2907.0 ± 689.0          |
| Vitamin A (µg)               | 1105.0 [802.0; 1492.0]  |
| Retinol (µg)                 | 241.0 [183.0; 336.0]    |
| Carotene (µg)                | 761.0 [534.0; 1115.0]   |
| α carotene (µg)              | 505.0 [234.0; 853.0]    |
| β carotene (µg)              | 4142.0 [2952.0; 6088.0] |
| B cryptoxanthin (µg)         | 272.0 [166.0; 431.0]    |
| Lutein+zeoxanthin (µg)       | 3065.0 [2286.0; 6150.0] |
| Lycopene (µg)                | 4311.0 [2982.0; 5579.0] |
| Folate (µg)                  | 277.0 [237.0; 329.0]    |
| Vitamin B <sub>12</sub> (mg) | 7.8 [6.2; 10.0]         |
| Vitamin B <sub>6</sub> (mg)  | 1.9 [1.6; 2.2]          |
| Vitamin C (mg)               | 103.0 [72.1; 143.0]     |
| Vitamin D (mg)               | 4.0 [3.2; 5.1]          |
| Vitamin E (mg)               | 14.2 [12.7; 16.4]       |
| Thiamine (mg)                | 1.6 [1.4; 1.7]          |
| Riboflavin (mg)              | 2.2 [1.9; 2.6]          |
| Niacin (mg)                  | 27.1 [23.7; 31.4]       |
| Niacin equivalents (mg)      | 43.3 [38.2; 48.1]       |
| Calcium (mg)                 | 1093.0 [895.0; 1324.0]  |
| Iron (mg)                    | 12.7 [11.4; 14.1]       |
| Sodium (mg)                  | 3403.0 ± 559.0          |
| Potassium (mg)               | 3406.0 ± 670.0          |
| Magnesium (mg)               | 407.0 [358.0; 466.0]    |
| Zinc (mg)                    | 11.6 ± 1.6              |
| Selenium (µg)                | 142.0 [125.0; 158.0]    |

<sup>a</sup> Adjusted by energy intake. Data are shown as mean ± standard deviation (SD) or median [interquartile].
